# Supplementary material for: Genome-wide association analysis and candidate gene identification for plant height in Shanxi local foxtail millet varieties
Source: Research Square preprint supplement (doi:10.21203/rs.3.rs-8422656/v1), 2026-01-14
Supplement: Supplementary file 1 [file 3a99a4e2b4c3c90851c9dcc4.xlsx]

## Sheet: Sheet1
Table S3 Geographical origins of the 209 foxtail millet accessions used in this study.
ID	Name	Origin	Group ID	Cluster ID
SK1109A	Jingu21	Lvliang	Group3	Cluster1
SK1110A	Baiyangdabaigu	Datong	Group4	Cluster3
SK1111A	Dabaigu	Datong	Group4	Cluster2
SK1112A	Dabaigu	Datong	Group4	Cluster4
SK1113A	Dabaigu	Datong	Group4	Cluster4
SK1114A	Dabaigu	Shuozhou	Group4	Cluster3
SK1115A	Dabaigu	Shuozhou	Group4	Cluster4
SK1116A	Dabaigu	Shuozhou	Group4	Cluster3
SK1117A	Dabaigu	Taiyuan	Group3	Cluster2
SK1118A	Dabaigu	Taiyuan	Group3	Cluster2
SK1119A	Dabaigu	Taiyuan	Group1	Cluster2
SK1120A	Dabaigu	Taiyuan	Group3	Cluster1
SK1121A	Dabaigu	Taiyuan	Group1	Cluster1
SK1122A	Dabaigu	Yangquan	Group3	Cluster2
SK1123A	Dabaigu	Yangquan	Group3	Cluster2
SK1124A	Hongmiaodabaigu	Yangquan	Group3	Cluster2
SK1125A	Dabaigu	Jinzhong	Group3	Cluster2
SK1126A	Dabaigu	Jinzhong	Group3	Cluster2
SK1127A	Dabaigu	Jinzhong	Group3	Cluster2
SK1128A	Dabaigu	Jinzhong	Group1	Cluster4
SK1130A	Dabaigu	Jinzhong	Group3	Cluster2
SK1131A	Dabaigu	Jinzhong	Group3	Cluster2
SK1132A	Dabaigu	Jinzhong	Group2	Cluster2
SK1133A	Dabaigu	Jinzhong	Group3	Cluster1
SK1134A	Dabaigu	Linfen	Group3	Cluster1
SK1135A	Dabaigu	Linfen	Group2	Cluster2
SK1136A	Qitoudabaigu	Linfen	Group2	Cluster2
SK1137A	Dabaigu	Linfen	Group4	Cluster4
SK1138A	Dabaigu	Linfen	Group2	Cluster1
SK1139A	Dabaigu	Jinzhong	Group3	Cluster2
SK1140A	Dabaigu	Taiyuan	Group3	Cluster2
SK1141A	Dabaigu	Jinzhong	Group3	Cluster2
SK1142A	Dabaigu	Jinzhong	Group3	Cluster2
SK1143A	Dabaigu	Changzhi	Group3	Cluster2
SK1144A	Dabaigu	Changzhi	Group3	Cluster2
SK1145A	Dabaigu	Changzhi	Group3	Cluster2
SK1146A	Dabaigu	Changzhi	Group3	Cluster1
SK1147A	Hongmiaodabaigu	Changzhi	Group2	Cluster2
SK1148A	Dabaigu	Changzhi	Group2	Cluster2
SK1149A	Dabaigu	Changzhi	Group2	Cluster1
SK1150A	Dabaigu	Changzhi	Group2	Cluster2
SK1151A	Dabaigu	Changzhi	Group3	Cluster2
SK1152A	Dabaigu	Changzhi	Group2	Cluster2
SK1153A	Dabaigu	Changzhi	Group4	Cluster3
SK1154A	Dabaigu	Changzhi	Group2	Cluster1
SK1155A	Dabaigu	Lvliang	Group4	Cluster4
SK1156A	Dabaigu	Jinzhong	Group2	Cluster2
SK1157A	Dabaigu	Yangquan	Group3	Cluster3
SK1158A	Hongmiaodabaigu	Yangquan	Group2	Cluster2
SK1159A	Dabaigu	Jinzhong	Group4	Cluster4
SK1160A	Dabaigu	Taiyuan	Group4	Cluster4
SK1161A	Dabaigu	Taiyuan	Group3	Cluster1
SK1162A	Dabaigu	Taiyuan	Group3	Cluster2
SK1163A	Dabaigu	Yangquan	Group4	Cluster4
SK1164A	Dabaigu	Jinzhong	Group3	Cluster3
SK1166A	Dabaigu	Datong	Group4	Cluster4
SK1167A	Qitoydabaigu	Datong	Group4	Cluster4
SK1168A	Dabaigu	Datong	Group4	Cluster2
SK1170A	Dabaigu	Datong	Group4	Cluster3
SK1171A	Dabaigu	Shuozhou	Group4	Cluster3
SK1172A	Qitoudabaigu	Shuozhou	Group4	Cluster4
SK1174A	Dabaigu	Datong	Group2	Cluster2
SK1175A	Erbaigu	Datong	Group4	Cluster3
SK1176A	Xiaobaigu	Datong	Group3	Cluster1
SK1177A	Baigu	Datong	Group4	Cluster3
SK1178A	Erbaigu	Datong	Group3	Cluster3
SK1179A	Xiaobaigu	Datong	Group3	Cluster3
SK1181A	Xiaobaigu	Datong	Group4	Cluster4
SK1182A	Baigu	Datong	Group4	Cluster3
SK1184A	Hongyangbaigu	Datong	Group4	Cluster3
SK1185A	Jianxibaigu	Datong	Group4	Cluster3
SK1186A	Jianxibaigu	Datong	Group4	Cluster4
SK1187A	Yulinbaobaigu	Datong	Group4	Cluster3
SK1188A	Xiaobaigu	Datong	Group4	Cluster2
SK1189A	Dabaigu	Datong	Group3	Cluster1
SK1190A	Xiaoguzi	Datong	Group4	Cluster4
SK1191A	Erbaigu	Datong	Group4	Cluster3
SK1192A	Xiaobaigu	Datong	Group4	Cluster2
SK1193A	Xiaobaigu	Datong	Group4	Cluster3
SK1194A	Changbaigu	Datong	Group4	Cluster3
SK1195A	Dariqibaigu	Shuozhou	Group4	Cluster3
SK1197A	Sanbaigu	Shuozhou	Group4	Cluster3
SK1198A	Sanbaigu	Shuozhou	Group4	Cluster4
SK1199A	Xichengbaigu	Datong	Group4	Cluster3
SK1200A	Erbaigu	Datong	Group4	Cluster4
SK1201A	Erbaigu	Datong	Group4	Cluster4
SK1202A	Erbaigu	Shuozhou	Group4	Cluster3
SK1203A	Xiaobaigu	Shuozhou	Group3	Cluster2
SK1204A	Dabaigu	Shuozhou	Group3	Cluster2
SK1205A	Dabaigu	Shuozhou	Group4	Cluster3
SK1206A	Erbaigu	Taiyuan	Group3	Cluster3
SK1207A	Changsuibaigu	Taiyuan	Group4	Cluster2
SK1208A	Xiaobaigu	Taiyuan	Group4	Cluster2
SK1209A	Baigu	Jinzhong	Group3	Cluster2
SK1210A	Shouyangbaigu	Jinzhong	Group3	Cluster2
SK1211A	Erbaigu	Jinzhong	Group3	Cluster2
SK1213A	Hongmiaoxiaobaigu	Yangquan	Group2	Cluster2
SK1214A	Baigu	Jinzhong	Group2	Cluster1
SK1215A	Erbaigu	Jinzhong	Group3	Cluster2
SK1216A	Xiaobaigu	Jinzhong	Group2	Cluster2
SK1217A	Baigu	Jinzhong	Group4	Cluster4
SK1218A	Xiaobaigu	Jinzhong	Group3	Cluster3
SK1219A	Xiaobaigu	Jinzhong	Group1	Cluster4
SK1220A	Erbaigu	Jinzhong	Group2	Cluster2
SK1221A	ZIbaigu	Jinzhong	Group1	Cluster2
SK1222A	Laolaibaigu	Jinzhong	Group2	Cluster2
SK1223A	Zimiaobaigu	Jinzhong	Group2	Cluster2
SK1224A	Xiaobaigu	Jinzhong	Group3	Cluster1
SK1225A	Changbaigu	Jinzhong	Group3	Cluster2
SK1226A	Xiaobaigu	Jinzhong	Group1	Cluster4
SK1227A	Zhoubaigu	Jinzhong	Group2	Cluster2
SK1228A	Shouyangbaigu	Jinzhong	Group3	Cluster2
SK1229A	Baigu	Linfen	Group2	Cluster1
SK1230A	Baigu	Linfen	Group2	Cluster2
SK1231A	Baigu	Linfen	Group2	Cluster2
SK1232A	Baiguzi	Linfen	Group2	Cluster2
SK1233A	Erbaigu	Linfen	Group2	Cluster2
SK1234A	Xiaobaigu	Linfen	Group2	Cluster2
SK1235A	Xiaobaigu	Linfen	Group2	Cluster2
SK1236A	Xiaoshengbaigu	Linfen	Group3	Cluster4
SK1237A	Hongganbaigu	Linfen	Group4	Cluster4
SK1238A	Baigu	Linfen	Group2	Cluster2
SK1239A	Duanmaolaobaigu	Linfen	Group3	Cluster1
SK1240A	Duanshengbaigu	Linfen	Group2	Cluster2
SK1241A	Xiaobaigu	Linfen	Group2	Cluster2
SK1242A	Maoxiaobaigu	Linfen	Group2	Cluster2
SK1243A	Wumaolaobaigu	Linfen	Group2	Cluster1
SK1244A	Baigu	Linfen	Group3	Cluster2
SK1245A	Laobaigu	Linfen	Group2	Cluster1
SK1246A	Baigu	Linfen	Group4	Cluster3
SK1247A	Xiaobaigu	Linfen	Group4	Cluster3
SK1248A	Xiaobaigu	Linfen	Group4	Cluster3
SK1249A	Baigu	Yuncheng	Group2	Cluster2
SK1250A	Jianjubaigu	Lvliang	Group3	Cluster2
SK1251A	Shibaigu	Jinzhong	Group4	Cluster4
SK1252A	Laolaibaigu	Jinzhong	Group3	Cluster3
SK1253A	Xiaobaigu	Jinzhong	Group2	Cluster2
SK1254A	Jiansuibaigu	Jinzhong	Group2	Cluster2
SK1255A	Xiaobaigu	Lvliang	Group2	Cluster2
SK1256A	Hongmiaoerbaigu	Jinzhong	Group3	Cluster3
SK1257A	Changsuibaigu	Taiyuan	Group4	Cluster2
SK1258A	Laobaigu	Jinzhong	Group4	Cluster4
SK1259A	Hongmiaobaigusui	Jinzhong	Group4	Cluster3
SK1260A	Baigubaimicao	Changzhi	Group2	Cluster2
SK1261A	Erbaigu	Changzhi	Group3	Cluster3
SK1262A	Sanxiaobaigu	Changzhi	Group3	Cluster2
SK1263A	Laobaigu	Changzhi	Group2	Cluster4
SK1264A	Xiaobaigu	Changzhi	Group2	Cluster1
SK1265A	Zhoubaigu	Changzhi	Group2	Cluster2
SK1267A	Jiansuimaobaigu	Changzhi	Group2	Cluster2
SK1268A	Dibaigu	Jincheng	Group2	Cluster2
SK1269A	Zhoubaigu	Changzhi	Group3	Cluster3
SK1270A	Tutouxiaobaigu	Changzhi	Group2	Cluster2
SK1271A	Zhoutuibaigu	Changzhi	Group3	Cluster3
SK1272A	Xiaobaigu	Changzhi	Group3	Cluster3
SK1273A	Tubaigu	Changzhi	Group2	Cluster2
SK1274A	Benbaigu	Changzhi	Group2	Cluster2
SK1275A	Xiaobaigu	Changzhi	Group3	Cluster3
SK1276A	Erbaigu	Changzhi	Group3	Cluster3
SK1277A	Zhoubaigu	Changzhi	Group2	Cluster1
SK1278A	Xiaobaigu	Changzhi	Group3	Cluster3
SK1279A	Sanxiaobaigu	Changzhi	Group2	Cluster2
SK1280A	Baigu	Changzhi	Group2	Cluster2
SK1282A	Baigu	Changzhi	Group2	Cluster1
SK1283A	Qinyuanbaigu	Changzhi	Group2	Cluster4
SK1284A	Xiaobaigu	Changzhi	Group3	Cluster2
SK1285A	Baigu	Changzhi	Group4	Cluster4
SK1286A	Erbaigu	Changzhi	Group3	Cluster3
SK1287A	Xiaobaigu	Changzhi	Group3	Cluster2
SK1288A	Baigu	Changzhi	Group3	Cluster2
SK1289A	Xiaobaigu	Changzhi	Group2	Cluster1
SK1290A	Xiaobaigu	Changzhi	Group3	Cluster3
SK1291A	Erbaigu	Changzhi	Group3	Cluster3
SK1292A	Xiaobaigu	Jincheng	Group2	Cluster1
SK1293A	Chenhuibaigu	Lvliang	Group3	Cluster3
SK1294A	Liangweibabaigu	Linfen	Group4	Cluster3
SK1295A	Baigu	Linfen	Group2	Cluster1
SK1296A	Changbaigu	Yangquan	Group4	Cluster4
SK1297A	Xiaobaigu	Jinzhong	Group2	Cluster2
SK1298A	Xiaobaigu	Jinzhong	Group1	Cluster4
SK1299A	Xiaobaigu	Yangquan	Group2	Cluster2
SK1300A	Xiaobaigu	Jinzhong	Group3	Cluster4
SK1301A	Hongmiaobaigu	Jinzhong	Group2	Cluster2
SK1302A	Xiaobaigu	Jinzhong	Group2	Cluster4
SK1303A	Xiaobaigu	Shijiazhuang	Group2	Cluster1
SK1304A	Laolaibaigu	Cangzhou	Group2	Cluster2
SK1305A	Dugenbaigu	Xingtai	Group2	Cluster2
SK1306A	Jianjubaigu	Lvliang	Group4	Cluster4
SK1307A	Erbaigu	Jinzhong	Group3	Cluster2
SK1308A	Erbaigu	Yangquan	Group2	Cluster2
SK1309A	Xiaobaigu	Jinzhong	Group2	Cluster1
SK1310A	Xiaobaigu	Jinzhong	Group2	Cluster2
SK1312A	Baigu	Jinzhong	Group3	Cluster2
SK1313A	Erbaigu	Datong	Group4	Cluster3
SK1314A	baiguzi	Datong	Group4	Cluster3
SK1315A	Erbaigu	Datong	Group4	Cluster3
SK1316A	Xiaobaigu	Datong	Group4	Cluster3
SK1317A	Shunbaigu	Datong	Group4	Cluster3
SK1318A	Ebaigu	Datong	Group4	Cluster3
SK1320A	Caobaigu	Datong	Group4	Cluster3
SK1321A	Xiaobaigu	Shuozhou	Group4	Cluster3
SK1322A	Xiaobaigu	Datong	Group4	Cluster4
SK1323A	Lianbaigu	Datong	Group4	Cluster3
SK1324A	Baigu	Datong	Group4	Cluster3
SK1325A	Zaoerbaigu	Datong	Group4	Cluster3
SK1326A	Sanbaigu	Datong	Group4	Cluster3
SK1327A	Xiaobaigu	Datong	Group2	Cluster2
SK1328A	Baigu	Datong	Group4	Cluster4
SK1329A	Jiansuibaigu	Jinzhong	Group2	Cluster2
