# Supplementary material for: Genome-wide association analysis and candidate gene identification for plant height in Shanxi local foxtail millet varieties
Source: Research Square preprint supplement (doi:10.21203/rs.3.rs-8422656/v1), 2026-01-14
Supplement: Supplementary file 2 [file 4f3ee1d2330439c21b1dc6f5.xlsx]

## Sheet: Sheet1
Table S4 The overlapping QTLs between present and previous studies.
QTL	QTN marker	Chr	QTL region (bp)	Previous Reported QTL	Position of Previous QTL	Ref
qPH2.1	chr2:5191820	2	50,918,209–5,291,820
qPH2.2	chr2:24736879	2	24,636,879–24,836,879	qPH2-1;qPH02.13;qPH2	8.10Mb–28.52Mb;LDB_2_24921046;26,040,234bp–28,913,785bp	Gao et al.,2025;Dai et al.,2024;He etal.,2021
qPH4	chr4:8228049	4	8,128,049–8,328,049
qPH8	chr8:911022	8	811,022–1,011,022
