# Supplementary material for: Genome-wide association analysis and candidate gene identification for plant height in Shanxi local foxtail millet varieties
Source: Research Square preprint supplement (doi:10.21203/rs.3.rs-8422656/v1), 2026-01-14
Supplement: Supplementary file 3 [file 66823a1e224a15c0b13b30d3.xlsx]

## Sheet: Sheet1
Table S7 Plant height (cm) of 313 accessions grouped by haplotype (H1–H6) across five field environments
Hap	18JZ_PH	19JZ_PH	20JZ_PH	20YC_PH	20DT_PH
H1	105.4	97.4	97	102.37	117.1
H1	79	71.6	71.8	80.7	98
H1	106.6	110.4	110.4	114	125.8
H1	113.4	115.4	116.6	126.6	130.5
H1	130.6	116.4	116	129	115.2
H1	114.6	98	123	134.4	127.6
H1	128.2	122.8	103.2	106.8	117
H1	106.2	100.2	98.6	120.3	118.2
H1	115.6	95	111.6	118.28	108.1
H1	130.2	120.6	123.2	127.2	135.5
H1	125	102.8	114	115.2	110
H1	128.6	102.8	128.6	NA	110
H1	142.8	118	136.8	127.5	127
H1	125.6	106	125.4	138	122
H1	128	103.8	115.2	128.1	111
H1	127.8	118.4	126.6	142.9	118
H1	121.8	127.8	140.4	125.7	132
H1	131.6	113.2	120.4	126.03	121
H1	129.6	124.4	132	145.5	126
H1	153.4	136.2	159.4	152.4	142.8
H1	147.6	118.4	153.2	132.9	140
H1	137	113.8	137.6	138.3	131
H1	127.8	108.6	125.2	134.7	117.9
H1	129.8	109.2	110.6	138.3	112
H1	148.8	128	139.6	161.07	139.7
H1	138.4	120.8	135.4	132.63	NA
H1	141.2	130.8	146.6	139.2	NA
H1	130.8	107.8	114.6	121.5	129.1
H1	129.8	113.8	123.8	112.5	126
H1	147.2	140.6	149.6	139.8	131.5
H1	148.2	130	137.8	130.8	130
H1	142.8	141.6	153.2	135.3	139.8
H1	123.4	109.6	113.2	126.6	126
H1	132	128.4	147	122.7	129
H1	127.4	113.4	111.6	133.2	121
H1	126	126.6	136.5	156.03	128
H1	145.8	125.6	125.6	164.4	132.4
H1	132.4	111.6	122	132.6	116
H1	132.2	120.6	119.4	107.1	133
H1	96.6	87.4	94.2	114.9	106
H1	116	110.6	111	122.7	124
H1	91.8	64	75	97.8	101
H1	88.4	88.2	90.4	110.4	98.4
H1	93.2	109.8	125	132.3	132
H1	105.6	116.4	116	124.2	117
H1	131.2	113.6	134.6	133.47	130
H1	156.6	112.4	138.8	144.6	133
H1	135.4	118.4	133.6	125.7	134
H1	145	131.8	149.8	135.9	144.7
H1	132.6	134.4	154.2	146.73	149
H1	111.4	121.6	126.6	144	114
H1	126.8	122.2	129.4	134.4	119
H1	124.4	115.8	122.4	130.2	138.8
H1	63.2	69	78.2	70.27	74
H1	116.8	129.6	137	114	128
H1	59.8	64.2	74	66.3	79
H1	124.8	106.2	126.2	131.7	139.1
H1	124	106.6	122.8	118.8	124
H1	131.2	109.4	126.2	130.5	135
H1	130.2	117.8	139.4	140.4	138
H1	136.2	137	151.2	128.7	129
H1	138.6	125.6	137.4	132	130
H1	118.8	100.6	125.4	126.6	111.9
H1	143.6	141.8	147.8	154.2	140.2
H1	143.8	139.4	159.4	149.1	151.4
H1	127.4	111.6	121.2	126.9	131
H1	144.2	104	133.6	156.87	139
H1	141.2	138.6	154.4	150.9	146.6
H1	143.8	132.4	142.6	130.8	132
H1	114.2	104	126.8	114.3	113
H1	149	129.2	150.6	146.4	139
H1	107.4	129.8	135	105	127
H1	103.6	110.2	129.4	143.1	116
H1	112.4	132.2	161.4	135.6	148
H1	117.8	103.2	117	114.93	117
H1	131.4	140.6	137.8	135.3	129
H1	110.8	88.4	97.6	105	105
H1	112.8	123.2	139.2	126	136
H1	117.4	125.6	130	124.6	138
H1	127.4	96.2	101	130.2	133
H1	135.8	122.4	142.8	127.5	139
H1	114.6	119	144.4	112.5	125
H1	63.2	67.8	69.4	77.43	80
H1	152.4	129.4	146.2	137.53	144
H1	137.8	110	141.4	144.3	127
H2	94	82.8	78.4	99.9	98
H2	101	97.4	105.4	116.7	114
H2	100.2	95.4	96.6	110.7	114
H2	NA	77.6	104.4	114	120
H2	94.4	88.6	89.6	109.5	110
H2	98	79.8	86.6	97.5	108
H2	103.6	108.2	117.4	126.9	126
H2	115.2	107	105.4	126	96
H2	116.8	102	113.4	122.4	122
H2	118.3	107.8	117	132.6	117
H2	104	105.8	100.2	122.1	118
H2	129.2	125.6	103	128.4	144
H2	129	119	119.6	133.8	143
H2	139	114.2	127.4	120.9	119
H2	131	110.2	125.4	135.9	127
H2	119.8	101.4	109.4	134.7	117
H2	114.8	106.4	124.8	117.6	121
H2	112	84.4	97.6	108.57	110
H2	131.8	113.6	126.4	129.3	125
H2	167.2	156.8	157.8	153.9	154
H2	86.8	88.8	91.33	103.2	87
H2	91.4	85.8	73.8	116.25	101
H2	44.2	92.8	96.6	121.5	94
H2	86.6	93	91.2	110.4	92
H2	104	94.8	97.2	111.3	92
H2	77.2	73.4	56.4	88.2	90
H2	106.8	104.2	92.4	NA	121
H2	95	93.6	89.6	117	109
H2	99.4	92.2	98.8	120.63	104
H2	118.6	117.6	113.4	125.4	127
H2	65.2	84	69.8	86.77	82
H2	86	79.8	73.6	114.6	100
H2	94.6	91	80.6	99	99
H2	80	86.6	77.6	103.2	96
H2	78.4	72.2	61.4	108.27	86
H2	87	95	99.8	123	125
H2	91.6	101	105.5	126.6	109
H2	131.2	113.2	116.2	130.8	137
H2	120	100.8	109.4	116.1	128
H2	135.6	110.8	128.2	141.9	120
H2	135.8	103.8	119.6	144.93	121
H2	111.4	109.4	131.8	139.2	136
H2	119.4	128.8	140.4	135.9	124
H2	107.2	107.8	106.6	121.5	110
H2	137.2	138.8	134.5	122.7	140
H2	148.8	128.2	156.8	142.2	142
H2	119.6	112.4	123.4	115.8	116
H2	83.4	97.8	79.4	104.1	105
H2	138.8	127.2	133.8	123.3	127
H2	89	70.8	74.2	106.8	82
H2	104.8	88.2	90.4	102.6	119
H2	145	116.6	132.6	132.3	130
H2	113.4	107.2	98.8	127.23	99
H3	125.8	114.6	125.2	111	113
H3	107.2	96.2	105.8	107.7	116
H3	113.2	122.4	130.8	136.2	127
H3	121.8	114.8	136.4	134.7	142
H3	118.6	109.4	113	117	109
H3	117.4	84.2	119	121.2	133
H3	94.2	93.8	114.4	126	107
H3	134.8	127.4	137.6	133.2	132
H3	129.6	107.4	125.2	132.6	128
H3	142.6	118	125.6	139.5	129
H3	129.6	118.6	121.8	138.9	124
H3	145.4	126.8	148.2	125.1	112
H3	145.4	130.2	131	136.8	138
H3	105.8	94	98.8	126.6	108
H3	149.4	105.2	146.6	146.1	145
H3	87.75	63.4	74.8	116.73	97
H3	115.8	101	131.8	131.1	112
H3	126.8	103.6	120.8	114.43	116
H3	137.2	128.4	141	142.5	140
H3	50.5	124.6	40.8	111	72
H3	133.4	119.2	126.8	142.77	119
H3	83.6	81.8	91.8	110.7	117
H3	104.8	106.2	95.6	118.8	109
H3	105.4	100.6	105.6	122.1	106
H3	98.2	115.6	124.6	130.77	134
H3	127	117.6	100	136.2	125
H3	123	103.2	91	113.7	90
H3	107.4	109.8	129	132.9	139
H3	127	104.2	124.6	142.8	119
H3	120	97.2	121.4	133.47	123
H3	140	117.4	123.6	142.73	129
H3	121.4	99.6	118.4	136.2	119
H3	110.4	99.2	96.6	123.3	98
H3	102.2	105.2	112.4	128.7	108
H3	130	116.6	134.8	141.6	127
H3	127.2	90.8	110.2	133.2	127
H3	123.8	123.2	139.6	119.1	121
H3	121	115.8	130	122.1	120
H3	109	99.4	108.6	120.93	99
H3	105	83	101.8	109.5	94
H3	95.8	105.6	128.4	123.3	119
H3	110.4	99.2	100.4	120.6	124
H3	109	98.6	89.6	105.67	99
H4	101.6	84.2	84.6	106.5	108
H4	98.2	92	93.4	117.3	114
H4	112.8	110.2	112.8	114.9	133
H4	120.2	115.4	121.8	136.8	132
H4	126.4	124	128	121.8	131
H4	127.2	112.4	117.8	132.9	127
H4	137	102.4	124.2	141.9	127
H4	145.2	129.2	140.4	132.3	141
H4	144.6	138.4	163.6	144.3	140
H4	147.2	126	151.4	150.6	148
H4	112	98.8	113.2	104.3	120
H4	120	115.2	131.4	139.23	136
H4	108.2	85.2	101.8	119.4	115
H4	111	97	99.2	121.53	106
H4	137.6	122.4	122.4	143.1	130
H4	136.2	117.4	116	133.5	119
H4	123	96.2	100	117.6	108
H4	138	129.6	143.8	126.3	124
H4	104.2	84.8	95.6	117.3	103
H4	101.4	107	122	120.3	127
H4	116.8	107.6	128.2	129.6	116
H4	133.4	105	125.8	127.8	104
H4	125.6	110.6	129.8	116.73	126
H4	78	81.2	98.8	74.07	86
H4	92	98	91.4	87	70
H4	112.6	137.6	141.6	133.8	138
H4	106.4	129.2	144.4	116.1	124
H4	120	129.8	145.4	128.4	127
H4	100	119.4	128.6	117.9	119
H4	120.8	113.2	124	120.3	127
H4	128.4	117.8	132	99.9	109
H5	122	106.4	113.6	116.7	119
H5	127.6	112.6	131.4	117.3	142
H5	79.2	91	110.8	96.9	112
H5	120.2	112.2	129.4	122.4	119
H5	133.2	125.6	130	136.67	129
H5	117.8	100.2	127.2	120.3	128
H5	119.4	119.4	126.6	139.2	105
H5	110.2	111.6	112.6	129.9	123
H5	136.4	129.4	137.8	121.77	143
H5	113	111	122.2	134.33	121
H5	113.8	111.8	139.2	141.6	142
H5	100.6	85.2	110.2	112.13	125
H5	137.6	114.8	148	117	143
H5	94.8	111.6	108.2	119.7	117
H5	103.6	126.2	134	120.9	118
H5	135.4	121.8	143	126.3	132
H5	134	122.4	143.4	126.97	135
H5	143.2	124.2	159.2	135.6	151
H5	128	113.8	131	142.5	139
H5	126.8	114	132.6	115.2	NA
H5	106	114.4	133	149.4	127
H5	133.6	109.2	120	128.7	122
H5	136	126.2	154.6	130.8	121
H5	137.2	128.8	124.6	135.9	139
H5	119	126.2	139.2	123	130
H5	127.2	139.25	146.4	126.3	132
H5	122.8	142.2	150.8	126.3	137
H5	92	108.8	123.4	107.4	116
H5	110.4	125.6	133.4	136.5	133
H6	108	103.8	105.4	129.9	128
H6	96.8	89.2	90.8	120.9	99.1
H6	125.4	108.6	132.6	124.8	140
H6	140.2	128	138.4	140.7	131
H6	102.8	88.8	91.2	121.53	111
H6	95.6	95	91.6	128.7	95.2
H6	138.8	128	125.4	122.47	NA
H6	139.6	127	135	149.1	126
H6	128	118.4	112.4	117.3	114
H6	134.4	117.4	115	121.2	116
H6	132.8	149.8	158.4	146.5	NA
H6	126	110.2	110.8	131.1	111
H6	113.8	89.2	92	99	107
H6	116	99.4	111.6	143.4	110
