# Supplementary material for: Genome-wide association analysis and candidate gene identification for plant height in Shanxi local foxtail millet varieties
Source: Research Square preprint supplement (doi:10.21203/rs.3.rs-8422656/v1), 2026-01-14
Supplement: Supplementary file 4 [file 6a42629a73d61b1a993a044b.xlsx]

## Sheet: Sheet1
Table S6 Plant height (cm) of 209 accessions grouped by haplotype (H1–H4) across three field environments
Hap	20JZ_PH	21JZ_PH	22JZ_PH
H1	151.96	140.52	122.67
H1	118.84	145.98	94.33
H1	136.32	148.64	114.33
H1	146.43	170.02	122.67
H1	149.84	177.36	123.67
H1	153.88	173.28	128.67
H1	144.94	167	102.33
H1	144.64	159.74	120.67
H1	147.18	173.66	124.67
H1	147.88	171.94	124
H1	158.41	171.72	NA
H1	148.25	158.98	130.67
H1	156.02	172.72	135.33
H1	149.63	170.96	133.33
H1	168.89	180.54	149.33
H1	176.53	194.4	146
H1	176.93	191.7	151
H1	150.68	172.5	134.33
H1	151.78	163.46	139.67
H1	111.46	139.38	118
H1	129.44	139.78	109.33
H1	124.62	131.48	111.67
H1	117.67	134.42	90
H1	127.39	137.46	104
H1	120.82	137.76	121
H1	154.33	171.78	128
H1	154.18	171	128.33
H1	155.43	180.1	123
H1	154.98	177.26	115.67
H1	136.74	166.24	119.67
H1	152.37	167.38	123.33
H1	161.33	172	128
H1	163.5	182.64	131.67
H1	159.37	164.78	138.33
H1	156.46	161.28	144
H1	154.81	162.32	132
H1	140.93	152.36	117.33
H1	158.17	160.68	135.33
H1	168.36	174.08	NA
H1	150.67	162.22	138
H1	155.4	166.9	135
H1	156.33	174.32	132.67
H1	165.02	182.06	136
H1	165.5	181.9	142
H1	120.82	137.76	121
H1	160.5	174.5	147
H1	162.56	184.58	135
H1	178.3	NA	146.33
H1	152.79	170.34	128.33
H1	169.01	194.42	142
H1	165.21	181.54	142
H1	161.5	191.82	137.67
H1	156.52	171.44	130.33
H1	141.12	166.18	122.67
H1	135.43	155.83	108.67
H2	140.47	152.78	122.33
H2	142.75	157.24	118
H2	142.44	178.88	130.33
H2	163.4	NA	131.67
H2	145.14	159.92	128
H2	146.69	168.54	128.33
H2	134.34	151.52	118
H2	150.79	159.04	120.33
H2	136.4	143.86	122.33
H2	152	160.9	124
H2	129.78	154.84	115
H2	136.77	151.22	123
H2	156.96	169.62	123.67
H2	135.52	151.56	112
H2	155.28	158.68	129.67
H2	132.51	153.9	111.33
H2	145.84	179.92	118
H2	128.22	139.06	117
H2	127.41	155.24	125
H2	135.3	148.46	111.33
H2	128.35	132.68	104.67
H2	127.62	140.52	108.33
H2	148.62	161.92	140.33
H2	121.2	137.06	101.33
H2	132.62	141.48	107.67
H2	152.68	156.28	137.67
H2	129.12	147.54	111.33
H2	129.78	154.84	115
H2	125.86	158.04	94.33
H2	122.22	137.48	95.67
H2	128.72	151.24	101.33
H3	151.9	163.16	127.33
H3	155.74	170.2	131.33
H3	146.01	160.2	126.33
H3	143.11	166.66	129.67
H3	127.62	140.52	108.33
H3	152.37	167.38	123.33
H3	153.88	171.44	139
H3	149.52	166.62	121.33
H3	151.16	170.7	117.67
H3	153.2	165.32	130.67
H4	137.14	132.08	130.33
H4	135.43	155.83	108.67
H4	163.74	175.7	145.33
H4	155.49	172.2	132.67
H4	160.31	174.94	141
H4	127.43	147	110
H4	163.74	175.7	145.33
