# Supplementary material for: Genome-wide association analysis and candidate gene identification for plant height in Shanxi local foxtail millet varieties
Source: Research Square preprint supplement (doi:10.21203/rs.3.rs-8422656/v1), 2026-01-14
Supplement: Supplementary file 5 [file c7e72b8fa79feb54513ce170.xlsx]

## Sheet: Sheet1
Table S1 Phenotypic variation in plant height among 209 foxtail millet accessions across three environments.
sample	PH_20JZ	PH_21JZ	PH_22JZ
SK1109A	151.96	140.52	122.67
SK1110A	117.23	132.7	91
SK1111A	119.12	139.08	102.67
SK1112A	127.43	147	110
SK1113A	111.58	136.62	100.33
SK1114A	101.4	132.02	NA
SK1115A	118.84	145.98	94.33
SK1116A	96.15	127.24	NA
SK1117A	146.01	160.2	126.33
SK1118A	152.63	161.72	134.67
SK1119A	143.11	166.66	129.67
SK1120A	135.43	155.83	108.67
SK1121A	144.76	159.84	114.33
SK1122A	161.51	171.36	139.67
SK1123A	155.28	158.68	129.67
SK1124A	150.79	159.04	120.33
SK1125A	136.32	148.64	114.33
SK1126A	157.71	169.34	126
SK1127A	148.62	161.92	140.33
SK1128A	152	160.9	124
SK1130A	146.43	170.02	122.67
SK1131A	149.84	177.36	123.67
SK1132A	153.88	173.28	128.67
SK1133A	144.94	167	102.33
SK1134A	140.47	152.78	122.33
SK1135A	144.64	159.74	120.67
SK1136A	142.75	157.24	118
SK1137A	142.44	178.88	130.33
SK1138A	163.4	185.42	131.67
SK1139A	147.18	173.66	124.67
SK1140A	146.69	168.54	128.33
SK1141A	147.88	171.94	124
SK1142A	151.16	163.7	136.67
SK1143A	158.41	171.72	NA
SK1144A	148.25	158.98	130.67
SK1145A	156.02	172.72	135.33
SK1146A	149.63	170.96	133.33
SK1147A	136.4	143.86	122.33
SK1148A	150.26	161.48	135
SK1149A	168.89	180.54	149.33
SK1150A	149.07	159.34	133.67
SK1151A	158.85	161.54	144
SK1152A	176.53	194.4	146
SK1153A	162.54	193.46	136.67
SK1154A	176.93	191.7	151
SK1155A	145.14	159.92	128
SK1156A	146.43	167.46	129.33
SK1157A	149.75	161.38	127.67
SK1158A	163.04	172.26	137.67
SK1159A	151.74	160.74	141.67
SK1160A	158.82	168.96	143
SK1161A	150.68	172.5	134.33
SK1162A	151.78	163.46	139.67
SK1163A	171.59	187.58	141
SK1164A	149.76	159.12	133.67
SK1166A	134.34	151.52	118
SK1167A	129.05	151.36	108
SK1168A	111.46	139.38	118
SK1170A	130.08	147.48	109.67
SK1171A	116.48	138.26	104.67
SK1172A	136.77	151.22	123
SK1174A	135.52	151.56	112
SK1175A	105.3	NA	NA
SK1176A	111.58	123.42	92.33
SK1177A	132.51	153.9	111.33
SK1178A	129.44	139.78	109.33
SK1179A	124.62	131.48	111.67
SK1181A	108.71	124.46	91.67
SK1182A	122.6	133.54	102.67
SK1184A	118.8	144.54	95.67
SK1185A	127.44	143.2	104.33
SK1186A	153.72	171.06	135
SK1187A	131.36	142.56	113.33
SK1188A	119.12	137.18	108.67
SK1189A	117.67	134.42	90
SK1190A	99.69	NA	NA
SK1191A	119.98	130.94	117
SK1192A	118.82	132.04	110.33
SK1193A	124.1	121.3	117
SK1194A	128.22	139.06	107
SK1195A	102.24	123.76	NA
SK1197A	105.08	NA	95.67
SK1198A	127.39	137.46	104
SK1199A	127.62	140.52	108.33
SK1200A	120.82	137.76	121
SK1201A	94.15	NA	NA
SK1202A	127.41	155.24	95
SK1203A	135.3	148.46	111.33
SK1204A	128.35	132.68	104.67
SK1205A	109.9	121.2	93
SK1206A	147.13	165.38	126
SK1207A	131.16	153.7	100.67
SK1208A	138.28	163.58	112.67
SK1209A	151.89	169.5	121.67
SK1210A	153.66	156.14	127.33
SK1211A	152.51	161.36	124.67
SK1213A	149.82	165.64	120.33
SK1214A	151.9	163.16	127.33
SK1215A	154.48	172.6	125.33
SK1216A	154.33	171.78	128
SK1217A	121.2	137.06	101.33
SK1218A	154.18	171	128.33
SK1219A	150.43	178.16	111.33
SK1220A	155.43	180.1	123
SK1221A	151.04	156.48	138.33
SK1222A	137.14	132.08	130.33
SK1223A	168.08	171.42	151.33
SK1224A	149.93	172.46	123.33
SK1225A	154.98	177.26	115.67
SK1226A	145.84	179.92	118
SK1227A	152.68	156.28	137.67
SK1228A	154.01	172.36	124.67
SK1229A	155.63	160.68	134
SK1230A	155.43	171.2	132
SK1231A	163.34	174.56	139.67
SK1232A	182.23	NA	142
SK1233A	169.9	173.76	150.33
SK1234A	164.8	164.58	143.33
SK1235A	136.74	166.24	119.67
SK1236A	144.9	172.6	125
SK1237A	150.11	164.66	125.67
SK1238A	148.02	172.74	131.33
SK1239A	152.37	167.38	123.33
SK1240A	160.31	174.94	141
SK1241A	161.33	172	128
SK1242A	156.96	169.62	123.67
SK1243A	155.27	177.02	121
SK1244A	163.5	182.64	131.67
SK1245A	154.14	170.92	128
SK1246A	151.73	162.96	123.33
SK1247A	149.38	166.64	130
SK1248A	156.95	172.84	126
SK1249A	151.96	151.26	131.33
SK1250A	159.37	164.78	138.33
SK1251A	158.06	170.84	145.33
SK1252A	157.6	162.14	144.67
SK1253A	156.46	161.28	144
SK1254A	154.81	162.32	132
SK1255A	140.93	152.36	117.33
SK1256A	158.26	170.9	138.67
SK1257A	132.62	141.48	107.67
SK1258A	155	163.22	148.67
SK1259A	157.65	162.48	137.67
SK1260A	155.74	170.2	131.33
SK1261A	165.64	170.76	141.67
SK1262A	157.81	163.3	152.33
SK1263A	154.4	151.88	147.33
SK1264A	158.17	160.68	135.33
SK1265A	168.36	174.08	NA
SK1267A	150.67	162.22	138
SK1268A	166.33	183.32	145.67
SK1269A	159.93	174.36	139.33
SK1270A	155.4	166.9	135
SK1271A	156.33	174.32	132.67
SK1272A	165.02	182.06	136
SK1273A	165.5	181.9	142
SK1274A	177.44	NA	148.33
SK1275A	153.88	171.44	139
SK1276A	155.41	172.52	129
SK1277A	162.03	183.32	142.67
SK1278A	160.5	174.5	147
SK1279A	148.72	162.84	125.33
SK1280A	149.07	163.12	134
SK1282A	162.56	184.58	135
SK1283A	178.3	NA	146.33
SK1284A	159.67	154.4	141
SK1285A	152.79	170.34	128.33
SK1286A	148.47	162.4	134
SK1287A	155.43	162.5	139
SK1288A	159.31	176.8	142.33
SK1289A	154.93	173.76	140.33
SK1290A	169.01	194.42	142
SK1291A	163.01	172.74	142
SK1292A	121.31	159.32	NA
SK1293A	129.12	147.54	111.33
SK1294A	173.24	182.84	153.67
SK1295A	163.03	169.56	138.33
SK1296A	163.74	175.7	145.33
SK1297A	155.49	172.2	132.67
SK1298A	150.79	165.44	138.33
SK1299A	134.72	136.7	117.67
SK1300A	139.2	149.5	121
SK1301A	143.42	149.66	120
SK1302A	165.21	181.54	142
SK1303A	147.44	170.12	124
SK1304A	139.84	164.18	112.33
SK1305A	149.52	166.62	121.33
SK1306A	129.78	154.84	115
SK1307A	151.16	170.7	117.67
SK1308A	161.5	191.82	137.67
SK1309A	153.2	165.32	130.67
SK1310A	155.41	188.66	117.67
SK1312A	156.52	171.44	130.33
SK1313A	135.44	166.9	108.33
SK1314A	137.41	167.22	114
SK1315A	127.51	159.04	102
SK1316A	126.46	141.74	106.33
SK1317A	114.17	137.64	NA
SK1318A	130.4	144.24	111.67
SK1320A	134.53	154.58	118
SK1321A	129.99	153.14	109.33
SK1322A	141.12	166.18	122.67
SK1323A	115.56	133.02	99.67
SK1324A	125.86	158.04	94.33
SK1325A	122.22	137.48	95.67
SK1326A	128.72	151.24	101.33
SK1327A	140.34	151.36	117.67
SK1328A	132.8	155.74	108.67
SK1329A	165.27	189.64	131.67
Note: PH_20JZ, PH_21JZ and PH_22JZ denote plant height measured at Jinzhong in 2020, 2021 and 2022, respectively.
