# Supplementary material for: Genome-wide association analysis and candidate gene identification for plant height in Shanxi local foxtail millet varieties
Source: Research Square preprint supplement (doi:10.21203/rs.3.rs-8422656/v1), 2026-01-14
Supplement: Supplementary file 6 [file ebe1f462a4d901038fa40928.xlsx]

## Sheet: Sheet
Table S2 Summary of sequencing data quality statistics for each sample.
SampleID	All_Reads	All_Bases	All_RL（bp）	All_GC（%）	All_Q20（%）	All_Q30（%）	Clean_Data（G）	Mapped	Coverage%	MeanDepth
SK1109A	130000952	19500142800	150	45.065	99.03	96.2	19.5001	99.02	92.97	41.13
SK1110A	134017596	20102639400	150	45.055	98.965	96.005	20.1026	98.31	92.95	42.53
SK1111A	113963256	17094488400	150	45.25	98.835	95.44	17.0945	98.86	93.22	36.43
SK1112A	106818030	16022704500	150	45.09	98.535	94.33	16.0227	98.79	93.29	34.11
SK1113A	124325538	18648830700	150	45.17	99.085	96.395	18.6488	98.86	92.7	39.53
SK1114A	98387590	14758138500	150	45.725	98.575	94.55	14.7581	97.55	92.7	30.84
SK1115A	119507230	17926084500	150	45.355	98.76	95.505	17.9261	98.66	93.24	38.43
SK1116A	120808182	18121227300	150	45.325	98.89	95.675	18.1212	98.3	92.73	38.23
SK1117A	121818514	18272777100	150	45.41	99.01	96.18	18.2728	98.75	92.78	38.73
SK1118A	123560340	18534051000	150	45.24	98.945	95.89	18.5341	99.12	93.24	39.11
SK1119A	117530274	17629541100	150	45.295	98.83	95.495	17.6295	98.92	93.43	37.31
SK1120A	128507314	19276097100	150	45.23	98.935	95.98	19.2761	99.13	94.86	41.13
SK1121A	101545266	15231789900	150	45.025	98.84	95.53	15.2318	98.57	92.38	32.4
SK1122A	101008032	15151204800	150	45.07	98.495	94.405	15.1512	99.24	93.04	32.34
SK1123A	100461332	15069199800	150	45.115	98.4	93.73	15.0692	98.83	93.06	31.81
SK1124A	109727136	16459070400	150	45.1	98.29	93.385	16.4591	98.84	93.28	35.01
SK1125A	110425160	16563774000	150	45.43	98.29	93.37	16.5638	96.55	92.81	34.02
SK1126A	108622582	16293387300	150	44.745	98.5	94.07	16.2934	98.93	92.88	34.38
SK1127A	108378820	16256823000	150	45.06	98.44	94.11	16.2568	98.97	92.89	34.71
SK1128A	97523608	14628541200	150	45.025	98.38	93.85	14.6285	98.93	92.48	31.6
SK1130A	133995080	20099262000	150	45.19	98.845	95.625	20.0993	99.1	92.84	42.67
SK1131A	124599092	18689863800	150	45.14	98.795	95.415	18.6899	98.95	92.88	39.86
SK1132A	121561882	18234282300	150	44.95	98.755	95.275	18.2343	98.86	93.24	38.9
SK1133A	131424172	19713625800	150	45.165	98.665	95.005	19.7136	98.12	94.31	42.36
SK1134A	126179978	18926996700	150	45.185	98.74	95.23	18.927	98.81	92.94	40.54
SK1135A	118103490	17715523500	150	45.05	98.685	95.12	17.7155	99.09	92.72	37.95
SK1136A	138507864	20776179600	150	45.01	98.815	95.545	20.7762	98.73	93.59	44.45
SK1137A	128826338	19323950700	150	45.195	98.995	96.195	19.324	98.92	92.67	41.27
SK1138A	130620174	19593026100	150	45.18	98.755	95.29	19.593	98.99	93.07	41.41
SK1139A	97627874	14644181100	150	45.485	98.29	93.54	14.6442	97.39	92.8	30.58
SK1140A	125749420	18862413000	150	45.015	98.74	95.255	18.8624	98.86	92.82	40.38
SK1141A	109946554	16491983100	150	45.025	98.53	94.415	16.492	99.15	92.89	35.56
SK1142A	134395506	20159325900	150	45.135	98.755	95.285	20.1593	99.02	93.99	43.01
SK1143A	122537066	18380559900	150	45.27	98.58	94.66	18.3806	98.74	92.94	38.47
SK1144A	113272452	16990867800	150	45.03	98.79	95.425	16.9909	98.63	92.87	36.27
SK1145A	121973886	18296082900	150	45.305	98.6	94.715	18.2961	98.98	93.06	39.27
SK1146A	127650570	19147585500	150	45.295	98.76	95.31	19.1476	98.84	92.87	40.46
SK1147A	107815496	16172324400	150	45.165	98.735	95.23	16.1723	98.98	92.76	34.22
SK1148A	125799872	18869980800	150	45.03	98.84	95.615	18.87	98.74	92.77	39.96
SK1149A	111477066	16721559900	150	45.075	98.6	94.695	16.7216	98.71	92.74	35.55
SK1150A	114323646	17148546900	150	45.145	98.5	94.335	17.1485	98.79	93.14	36.71
SK1151A	111222368	16683355200	150	45.115	98.53	94.5	16.6834	99.01	93.06	35.45
SK1152A	118339462	17750919300	150	45.39	98.54	94.465	17.7509	99.01	93.04	37.92
SK1153A	130050582	19507587300	150	45.295	98.685	95.045	19.5076	98.81	92.7	41.5
SK1154A	135119492	20267923800	150	45.04	98.75	95.25	20.2679	98.48	93.3	43.2
SK1155A	125348170	18802225500	150	45.06	98.63	94.83	18.8022	98.87	93.11	39.88
SK1156A	112913044	16936956600	150	44.875	98.555	94.525	16.937	98.76	93.27	36.34
SK1157A	93611738	14041760700	150	45.775	98.495	94.39	14.0418	98.88	93.14	30.02
SK1158A	148166410	22224961500	150	45.245	98.635	94.855	22.225	98.62	93.4	47.53
SK1159A	113808046	17071206900	150	44.88	98.67	94.955	17.0712	98.98	92.92	36.19
SK1160A	118258546	17738781900	150	45.165	98.765	95.335	17.7388	99.15	92.68	37.59
SK1161A	100677170	15101575500	150	45.88	98.635	94.835	15.1016	98.85	92.81	32.07
SK1162A	142382010	21357301500	150	45.335	98.84	95.61	21.3573	98.97	93.14	44.87
SK1163A	133727320	20059098000	150	45.245	98.67	95	20.0591	98.82	93.12	42.91
SK1164A	109582992	16437448800	150	44.825	98.585	94.63	16.4374	98.13	92.76	34.77
SK1166A	114075992	17111398800	150	45.64	98.665	94.955	17.1114	99.04	92.75	36.46
SK1167A	131053468	19658020200	150	45.21	98.95	96.025	19.658	97.96	92.66	41.54
SK1168A	112303874	16845581100	150	46.18	98.49	94.33	16.8456	98.86	93.06	35.81
SK1170A	123215516	18482327400	150	46.035	98.505	94.415	18.4823	98.36	92.72	38.87
SK1171A	114601724	17190258600	150	45.29	98.6	94.745	17.1903	98.71	92.85	36.15
SK1172A	108399990	16259998500	150	45.2	98.48	94.23	16.26	99.02	92.98	34.79
SK1174A	94388734	14158310100	150	45.55	98.655	94.905	14.1583	99.07	92.68	29.96
SK1175A	112366246	16854936900	150	45.145	98.585	94.625	16.8549	98.4	92.62	35.37
SK1176A	128406246	19260936900	150	45.195	98.73	95.22	19.2609	99.31	93.95	41.16
SK1177A	130387300	19558095000	150	45.11	98.665	94.97	19.5581	98.92	92.94	41.78
SK1178A	117818106	17672715900	150	45.305	98.73	95.195	17.6727	99.23	93.42	38.14
SK1179A	123533060	18529959000	150	46.33	98.685	95.04	18.53	99.09	93.45	39.64
SK1181A	121700512	18255076800	150	45.24	98.265	93.5	18.2551	98.93	93.07	38.99
SK1182A	107427972	16114195800	150	45.155	98.73	95.205	16.1142	98.92	92.82	34.59
SK1184A	125545630	18831844500	150	45.305	98.73	95.25	18.8318	98.67	92.95	39.72
SK1185A	123980460	18597069000	150	45.335	98.79	95.435	18.5971	98.83	92.6	39.91
SK1186A	108082034	16212305100	150	45.1	98.525	94.455	16.2123	98.82	92.67	34.22
SK1187A	84501908	12675286200	150	44.835	97.72	91.335	12.6753	98.94	92.74	26.77
SK1188A	122335724	18350358600	150	45.225	98.74	95.32	18.3504	98.9	93.05	39.08
SK1189A	126824568	19023685200	150	45.45	98.815	95.515	19.0237	98.82	93.63	40.19
SK1190A	106553746	15983061900	150	45.315	98.485	94.27	15.9831	98.21	92.11	33.89
SK1191A	95679626	14351943900	150	45.36	98.6	94.69	14.3519	98.86	92.78	30.62
SK1192A	164175336	24626300400	150	45.285	98.63	94.835	24.6263	98.35	93.23	52.28
SK1193A	122951370	18442705500	150	45.425	98.705	95.085	18.4427	98.56	92.93	39.03
SK1194A	139995002	20999250300	150	46.775	98.86	95.715	20.9993	97.9	92.87	43.31
SK1195A	108497456	16274618400	150	45.55	98.49	94.295	16.2746	98.47	92.37	34.44
SK1197A	98350504	14752575600	150	45.745	98.51	94.39	14.7526	97.85	92.46	31.01
SK1198A	99345746	14901861900	150	45.155	98.51	94.355	14.9019	98.71	92.98	31.82
SK1199A	111701346	16755201900	150	45.215	98.595	94.69	16.7552	98.67	93.06	35.62
SK1200A	107450746	16117611900	150	45.27	98.705	95.12	16.1176	98.66	92.99	34.33
SK1201A	107279816	16091972400	150	45.515	98.535	94.46	16.092	98.35	92.8	34.16
SK1202A	104097232	15614584800	150	45.66	98.535	94.505	15.6146	99.17	92.73	33.05
SK1203A	106780128	16017019200	150	45.49	98.58	94.635	16.017	99.09	92.71	34.28
SK1204A	110937092	16640563800	150	45.055	98.57	94.585	16.6406	98.58	92.75	35.69
SK1205A	112438396	16865759400	150	46.25	98.65	94.895	16.8658	96.82	92.69	34.79
SK1206A	110340820	16551123000	150	45.745	98.61	94.775	16.5511	97.76	92.81	34.46
SK1207A	95342654	14301398100	150	45.345	98.22	93.245	14.3014	99.02	92.66	30.4
SK1208A	104278986	15641847900	150	45.415	98.47	94.23	15.6418	98.31	92.67	32.91
SK1209A	127120668	19068100200	150	45.365	98.74	95.25	19.0681	99.14	93.27	40.97
SK1210A	105506924	15826038600	150	45.13	98.185	93.12	15.826	98.97	93.17	34.22
SK1211A	91251344	13687701600	150	44.1	96.91	88.33	13.6877	98.37	92.56	29.32
SK1213A	117259050	17588857500	150	45.3	98.6	94.705	17.5889	98.93	93.21	37.66
SK1214A	120738314	18110747100	150	45.225	98.805	95.49	18.1107	99.09	92.93	38.95
SK1215A	106874084	16031112600	150	45.22	96.24	89.62	16.0311	98.84	93.3	34.5
SK1216A	102578736	15386810400	150	45.41	95.36	87.51	15.3868	98.64	93.1	32.43
SK1217A	126812702	19021905300	150	45.115	96.25	89.635	19.0219	98.4	93.05	40.65
SK1218A	120749558	18112433700	150	45.21	96.185	89.44	18.1124	99	93.51	38.51
SK1219A	116179956	17426993400	150	44.94	95.55	87.88	17.427	98.9	92.98	37.59
SK1220A	117856064	17678409600	150	44.775	95.935	88.895	17.6784	99.14	93.41	38.23
SK1221A	126048202	18907230300	150	45.145	96.03	89.04	18.9072	98.4	93.09	39.91
SK1222A	114553118	17182967700	150	45.075	96.555	90.44	17.183	98.93	92.93	36.85
SK1223A	98675666	14801349900	150	44.77	95.715	88.3	14.8013	99.19	93.38	32.44
SK1224A	143086064	21462909600	150	45.31	96.745	90.865	21.4629	99.08	93.2	45.61
SK1225A	98982504	14847375600	150	45	95.715	88.315	14.8474	99.01	92.89	31.54
SK1226A	115779602	17366940300	150	45.12	95.785	88.475	17.3669	98.77	92.94	36.48
SK1227A	111884518	16782677700	150	44.975	95.36	87.445	16.7827	98.32	94.22	35.45
SK1228A	125705640	18855846000	150	44.97	96.46	90.12	18.8558	98.92	93	39.84
SK1229A	121106972	18166045800	150	44.82	95.96	88.895	18.166	99.11	93.28	38.56
SK1230A	125597234	18839585100	150	44.915	96.235	89.56	18.8396	98.93	93.18	40.18
SK1231A	114552730	17182909500	150	44.805	96.275	89.67	17.1829	99.01	94	36.95
SK1232A	124044148	18606622200	150	45.02	96.01	88.98	18.6066	98.04	93.09	39.16
SK1233A	97105898	14565884700	150	45.145	95.675	88.215	14.5659	98.33	93.15	30.62
SK1234A	118462642	17769396300	150	44.655	95.885	88.685	17.7694	99.01	93.3	37.73
SK1235A	95714724	14357208600	150	44.945	95.215	87.125	14.3572	98.97	93.06	30.85
SK1236A	121935336	18290300400	150	45.15	96.32	89.79	18.2903	98.87	92.84	38.65
SK1237A	135388252	20308237800	150	45.135	96.34	89.82	20.3082	98.75	93.24	42.58
SK1238A	132929348	19939402200	150	44.72	96.345	89.88	19.9394	98.77	92.99	42.77
SK1239A	110446104	16566915600	150	44.92	96.33	89.805	16.5669	98.89	92.92	34.97
SK1240A	116848590	17527288500	150	45.2	96.135	89.335	17.5273	99.03	93.13	36.72
SK1241A	141444094	21216614100	150	45.365	96.61	90.51	21.2166	98.97	93.87	45.46
SK1242A	107081616	16062242400	150	44.97	96.035	89.06	16.0622	98.3	92.91	33.71
SK1243A	115106324	17265948600	150	45.305	96.15	89.375	17.2659	99.13	93.2	36.42
SK1244A	129025782	19353867300	150	45.075	96.515	90.315	19.3539	98.51	92.96	39.98
SK1245A	132800332	19920049800	150	45.265	96.415	90.025	19.92	98.92	92.98	41.85
SK1246A	130973034	19645955100	150	45.03	96.54	90.35	19.646	99	93.86	41.87
SK1247A	145003750	21750562500	150	44.865	96.685	90.745	21.7506	99.06	93.14	46.73
SK1248A	138435680	20765352000	150	45.355	96.85	91.115	20.7654	99.03	92.64	44.07
SK1249A	115676638	17351495700	150	45.04	95.895	88.73	17.3515	99.12	93.55	37.78
SK1250A	124292764	18643914600	150	44.885	96.105	89.24	18.6439	99.04	93.24	39.99
SK1251A	113309640	16996446000	150	44.965	95.87	88.64	16.9964	98.53	92.95	36.09
SK1252A	106473556	15971033400	150	45.295	95.735	88.395	15.971	98.59	93.38	34.06
SK1253A	156187960	23428194000	150	44.84	96.525	90.31	23.4282	98.86	93.3	50.05
SK1254A	101301114	15195167100	150	44.78	95.665	88.155	15.1952	98.56	92.61	32.5
SK1255A	106616300	15992445000	150	44.925	95.795	88.46	15.9924	98.75	92.61	34.29
SK1256A	124312400	18646860000	150	44.97	96.275	89.715	18.6469	98.53	93.14	39.43
SK1257A	141117084	21167562600	150	45.445	96.65	90.64	21.1676	98.88	92.95	44.37
SK1258A	136955514	20543327100	150	45.22	96.75	90.865	20.5433	98.27	92.92	42.69
SK1259A	115596110	17339416500	150	44.915	96.01	89.055	17.3394	98.9	92.69	37.21
SK1260A	134641718	20196257700	150	44.73	96.18	89.425	20.1963	99.05	92.91	41.85
SK1261A	112722614	16908392100	150	44.555	95.945	88.835	16.9084	99.14	93.75	35.43
SK1262A	122315586	18347337900	150	44.825	96.67	90.67	18.3473	98.85	93.14	38.69
SK1263A	122837622	18425643300	150	44.92	95.905	88.77	18.4256	98.74	93.41	38.75
SK1264A	113277368	16991605200	150	44.765	95.595	87.95	16.9916	98.35	93.75	36.01
SK1265A	120167390	18025108500	150	45.315	95.9	88.695	18.0251	98.95	92.75	38.04
SK1267A	108175586	16226337900	150	44.75	95.805	88.47	16.2263	98.22	93.34	34.6
SK1268A	128122052	19218307800	150	44.93	96.23	89.545	19.2183	98.98	93.08	40.5
SK1269A	105355848	15803377200	150	44.88	95.075	86.775	15.8034	98.9	93.17	33.98
SK1270A	104220512	15633076800	150	44.845	96.265	89.635	15.6331	98.32	93	33.01
SK1271A	119033122	17854968300	150	45.135	95.525	87.785	17.855	97.75	93.08	37.43
SK1272A	123458126	18518718900	150	45.13	95.915	88.785	18.5187	98.94	93.46	39.43
SK1273A	128297316	19244597400	150	45.18	96.47	90.15	19.2446	98.41	93.03	40.96
SK1274A	116329964	17449494600	150	44.915	95.915	88.76	17.4495	98.46	93.15	36.78
SK1275A	129689758	19453463700	150	44.88	95.945	88.825	19.4535	99.02	93.07	41.35
SK1276A	158938132	23840719800	150	45.09	96.28	89.665	23.8407	98.94	93.31	50.98
SK1277A	94336860	14150529000	150	44.945	95.545	87.87	14.1505	98.92	92.98	30.37
SK1278A	123786170	18567925500	150	44.82	96.33	89.785	18.5679	98.49	93.11	39.24
SK1279A	126302250	18945337500	150	44.985	95.905	88.72	18.9453	99.14	93.5	40.8
SK1280A	149411254	22411688100	150	45.445	96.45	90.105	22.4117	98.97	92.91	47.22
SK1282A	124804796	18720719400	150	45.01	95.655	88.11	18.7207	98.4	93.47	39.25
SK1283A	104032906	15604935900	150	45.045	95.475	87.645	15.6049	98.68	93.4	32.95
SK1284A	127221730	19083259500	150	44.915	95.725	88.31	19.0833	98.86	93.13	40.56
SK1285A	121148676	18172301400	150	44.78	95.58	87.91	18.1723	97.82	93.49	38.16
SK1286A	115480486	17322072900	150	44.76	95.965	88.88	17.3221	98.39	93.15	36.88
SK1287A	118959452	17843917800	150	45.06	96.015	89.015	17.8439	99.07	93.37	37.36
SK1288A	130339130	19550869500	150	45.565	96.13	89.33	19.5509	99.17	93.48	41.61
SK1289A	121833870	18275080500	150	46.055	95.985	88.99	18.2751	98.46	93.28	38.37
SK1290A	100686666	15102999900	150	44.775	95.27	87.18	15.103	98.46	93.01	31.9
SK1291A	101939764	15290964600	150	45.33	95.51	87.77	15.291	99.02	93.31	32.36
SK1292A	123629296	18544394400	150	45.125	96.155	89.345	18.5444	98.96	93.31	39.22
SK1293A	103955610	15593341500	150	45.01	95.515	87.785	15.5933	98.12	93.27	33.32
SK1294A	111142042	16671306300	150	44.945	96.015	89.02	16.6713	99.16	93.05	35.52
SK1295A	152897872	22934680800	150	45.335	97.77	92.83	22.9347	98.99	93.29	48.27
SK1296A	138917968	20837695200	150	45.59	96.435	90.085	20.8377	98.99	93.07	43.64
SK1297A	111328340	16699251000	150	45.44	95.785	88.45	16.6993	98.96	93.24	35.9
SK1298A	85952376	12892856400	150	44.895	95.115	86.855	12.8929	99.06	92.57	27.41
SK1299A	121654900	18248235000	150	45.08	95.9	88.715	18.2482	99.1	93.51	39.53
SK1300A	110397244	16559586600	150	44.785	95.195	87.04	16.5596	98.83	92.94	34.88
SK1301A	119010622	17851593300	150	44.845	96.235	89.595	17.8516	98.85	93.45	37.12
SK1302A	88733346	13310001900	150	45.035	96.33	89.81	13.31	99.05	92.75	28.28
SK1303A	129346256	19401938400	150	44.975	95.92	88.765	19.4019	98.99	92.97	41.89
SK1304A	125120204	18768030600	150	45.085	95.835	88.635	18.768	98.71	93.49	40.83
SK1305A	117125168	17568775200	150	44.895	95.41	87.56	17.5688	98.97	93.72	38.24
SK1306A	122213626	18332043900	150	45.895	95.215	87.155	18.332	98.95	93.09	39.32
SK1307A	148359824	22253973600	150	45.32	97.15	91.905	22.254	98.68	93.22	47.36
SK1308A	142414992	21362248800	150	44.915	96.42	90.035	21.3622	98.88	93.35	45.65
SK1309A	88550908	13282636200	150	44.775	96.675	89.995	13.2826	98.74	92.6	28.47
SK1310A	103376254	15506438100	150	44.69	96.42	89.325	15.5064	98.75	92.92	33.14
SK1312A	116674868	17501230200	150	44.685	97.015	90.95	17.5012	98.96	93	36.99
SK1313A	124917706	18737655900	150	45.185	97.24	91.615	18.7377	98.89	93.1	40.2
SK1314A	108289022	16243353300	150	44.725	96.97	90.85	16.2434	98.65	93.18	34.09
SK1315A	108937756	16340663400	150	44.755	96.74	90.155	16.3407	98.49	92.97	34.67
SK1316A	85107978	12766196700	150	45.04	96.73	90.16	12.7662	98.31	92.53	27.2
SK1317A	103830360	15574554000	150	44.945	96.87	90.585	15.5746	98.32	93	32.61
SK1318A	119745270	17961790500	150	45.255	97.02	90.96	17.9618	99.03	93.31	37.73
SK1320A	114266702	17140005300	150	44.96	96.93	90.715	17.14	98.25	92.67	35.51
SK1321A	114841648	17226247200	150	45.07	97.1	91.245	17.2262	97.82	93.3	36.1
SK1322A	105064732	15759709800	150	44.99	96.85	90.47	15.7597	98.94	93.4	33.52
SK1323A	105802064	15870309600	150	45.3	97.03	91.04	15.8703	98	93.13	33.36
SK1324A	121785598	18267839700	150	45.1	97.255	91.655	18.2678	98.88	93.19	38.62
SK1325A	136664942	20499741300	150	44.905	97.5	92.37	20.4997	98.02	93.08	43
SK1326A	126456800	18968520000	150	45.315	96.795	90.31	18.9685	98.48	93.89	40.07
SK1327A	115533012	17329951800	150	45.025	97.2	91.48	17.33	98.89	92.88	36.89
SK1328A	121919084	18287862600	150	44.885	97.315	91.815	18.2879	98.75	92.96	38.89
SK1329A	116218096	17432714400	150	45.365	97.375	92.005	17.4327	99.16	92.53	37.43

## Sheet: table.format
Item	Description			Item	Description		Lib_ID	All_Reads	All_Bases	All_RL（bp）	All_GC（%）	All_Q20（%）	All_Q30（%）	Clean_Data（G）				SampleID	TotalReads	Mapped	ProperPair	ZeroMQ	No MQ_0			SampleID	GenomeLength	CoveredBase	TotalDepth	Coverage%	MeanDepth
Population number	Group_Number			Reference name	Organism_name		pu001	129522686	19428402900	150.00_150.00	39.13%	97.97%	93.14%	19.43				pu001	130423118	130076544(99.73%)	125932645(96.56%)	8275160(6.34%)	122147958(93.66%)			pu001	741974678	698316769	17846959291	94.12	24.05
Sample number	Sample_Number			Reference source	RefSeq_accession		pu002	110219736	16532960400	150.00_150.00	39.11%	98.03%	93.37%	16.53				pu002	111004164	110941654(99.94%)	107225711(96.60%)	6965271(6.27%)	104038893(93.73%)			pu002	741974678	695740824	15197909932	93.77	20.48
Total sequencing bases (Gb)	Toatal_Raw_Bases			Genome size (Mb)	Genome_Size		pu003	80654966	12098244900	150.00_150.00	39.23%	97.56%	92.39%	12.10				pu003	81201192	81095592(99.87%)	78617485(96.82%)	5272300(6.49%)	75928892(93.51%)			pu003	741974678	686919993	11097155074	92.58	14.96
Average sequencing bases (Gb)	Average_Raw_Bases			Scaffold N50 (Mb)	Scaffold_N50		pu004	85742808	12861421200	150.00_150.00	39.02%	97.57%	92.43%	12.86				pu004	86315024	86256996(99.93%)	83726165(97.00%)	5307504(6.15%)	81007520(93.85%)			pu004	741974678	687290387	11847072075	92.63	15.97
Average depth (X)	Average_Depth						pu005	64566156	9684923400	150.00_150.00	39.21%	97.35%	91.76%	9.68				pu005	65006517	64921921(99.87%)	62948830(96.83%)	4093159(6.30%)	60913358(93.70%)			pu005	741974678	683910826	8901940830	92.17	12
							pu006	85536484	12830472600	150.00_150.00	39.27%	97.39%	91.84%	12.83				pu006	86123263	86031779(99.89%)	83416267(96.86%)	5476326(6.36%)	80646937(93.64%)			pu006	741974678	687279409	11779379094	92.63	15.88
							pu007	75391188	11308678200	150.00_150.00	39.14%	96.96%	90.47%	11.31				pu007	75902505	75861231(99.95%)	73722357(97.13%)	4736364(6.24%)	71166141(93.76%)			pu007	741974678	687770040	10395186185	92.69	14.01
							pu008	93155800	13973370000	150.00_150.00	39.26%	97.47%	92.10%	13.97				pu008	93766746	93705770(99.93%)	91122522(97.18%)	5846668(6.24%)	87920078(93.76%)			pu008	741974678	691113349	12852781514	93.15	17.32
							pu009	71872042	10780806300	150.00_150.00	38.94%	96.85%	90.14%	10.78				pu009	72359698	72315420(99.94%)	70290398(97.14%)	4452060(6.15%)	67907638(93.85%)			pu009	741974678	686083319	9923849940	92.47	13.37
							pu010	82320926	12348138900	150.00_150.00	38.97%	97.28%	91.52%	12.35				pu010	82897090	82851474(99.94%)	80346516(96.92%)	5130033(6.19%)	77767057(93.81%)			pu010	741974678	687666248	11363493437	92.68	15.32
							pu011	82743112	12411466800	150.00_150.00	38.99%	97.19%	91.19%	12.41				pu011	83313032	83260068(99.94%)	80818600(97.01%)	5170047(6.21%)	78142985(93.79%)			pu011	741974678	688653815	11416378278	92.81	15.39
							pu012	93346188	14001928200	150.00_150.00	39.26%	97.45%	92.06%	14.00				pu012	93970233	93902255(99.93%)	91062260(96.91%)	5893514(6.27%)	88076719(93.73%)			pu012	741974678	690691815	12875032150	93.09	17.35
							pu013	76582778	11487416700	150.00_150.00	39.25%	96.70%	90.22%	11.49				pu013	77076434	77008722(99.91%)	74853292(97.12%)	4673784(6.06%)	72402650(93.94%)			pu013	741974678	686936937	10535301338	92.58	14.2
							pu014	81548110	12232216500	150.00_150.00	38.93%	97.29%	91.51%	12.23				pu014	82087685	81912951(99.79%)	79646929(97.03%)	5091817(6.20%)	76995868(93.80%)			pu014	741974678	688346724	11250933384	92.77	15.16
							pu015	72201704	10830255600	150.00_150.00	39.14%	97.02%	90.67%	10.83				pu015	72699210	72652796(99.94%)	70655476(97.19%)	4407477(6.06%)	68291733(93.94%)			pu015	741974678	688385342	9974185682	92.78	13.44
							pu016	96706828	14506024200	150.00_150.00	39.16%	97.58%	92.46%	14.51				pu016	97378170	97303388(99.92%)	94292411(96.83%)	6290950(6.46%)	91087220(93.54%)			pu016	741974678	689881380	13314410694	92.98	17.94
							pu017	77512362	11626854300	150.00_150.00	39.04%	97.21%	91.24%	11.63				pu017	78062304	78011118(99.93%)	75690386(96.96%)	4958593(6.35%)	73103711(93.65%)			pu017	741974678	687429893	10676679041	92.65	14.39
							pu018	84713766	12707064900	150.00_150.00	39.17%	97.46%	92.06%	12.71				pu018	85286657	85208749(99.91%)	82580275(96.83%)	5342683(6.26%)	79943974(93.74%)			pu018	741974678	688406899	11685550620	92.78	15.75
							pu019	66504518	9975677700	150.00_150.00	39.34%	96.98%	90.57%	9.98				pu019	66970522	66900386(99.90%)	64812618(96.78%)	4169064(6.23%)	62801458(93.77%)			pu019	741974678	684987937	9177652296	92.32	12.37
							pu020	108099474	16214921100	150.00_150.00	39.18%	97.66%	92.68%	16.21				pu020	108842994	108771054(99.93%)	105610947(97.03%)	6913681(6.35%)	101929313(93.65%)			pu020	741974678	689385350	14902992029	92.91	20.09
							pu021	89685212	13452781800	150.00_150.00	39.14%	97.03%	90.69%	13.45				pu021	90285761	90218699(99.93%)	87588921(97.01%)	5345415(5.92%)	84940346(94.08%)			pu021	741974678	689418036	12424823632	92.92	16.75
							pu022	96888102	14533215300	150.00_150.00	39.14%	97.24%	91.36%	14.53				pu022	97535337	97468891(99.93%)	94622931(97.01%)	5927492(6.08%)	91607845(93.92%)			pu022	741974678	690489325	13397489710	93.06	18.06
							pu023	98300846	14745126900	150.00_150.00	39.19%	97.51%	92.27%	14.75				pu023	98949860	98565092(99.61%)	95629138(96.64%)	6424568(6.49%)	92525292(93.51%)			pu023	741974678	690040689	13514253849	93	18.21
							pu024	73880594	11082089100	150.00_150.00	39.22%	97.39%	91.83%	11.08				pu024	74396385	74157205(99.68%)	72069247(96.87%)	4984722(6.70%)	69411663(93.30%)			pu024	741974678	686236322	10133922707	92.49	13.66
							pu025	92546072	13881910800	150.00_150.00	39.17%	97.48%	92.13%	13.88				pu025	93186711	93110941(99.92%)	90224531(96.82%)	5915014(6.35%)	87271697(93.65%)			pu025	741974678	689528567	12763008536	92.93	17.2
							pu026	83995484	12599322600	150.00_150.00	39.11%	97.44%	92.00%	12.60				pu026	84596831	84543885(99.94%)	81851856(96.76%)	5542158(6.55%)	79054673(93.45%)			pu026	741974678	688197492	11551094802	92.75	15.57
							pu027	91333892	13700083800	150.00_150.00	39.33%	97.32%	91.63%	13.70				pu027	91953570	91893246(99.93%)	89061648(96.86%)	6011960(6.54%)	85941610(93.46%)			pu027	741974678	686809645	12557296574	92.57	16.92
							pu028	74351568	11152735200	150.00_150.00	39.23%	96.90%	90.31%	11.15				pu028	74879021	74816835(99.92%)	72498353(96.82%)	4739348(6.33%)	70139673(93.67%)			pu028	741974678	685265581	10245393254	92.36	13.81
							pu029	80758434	12113765100	150.00_150.00	39.13%	97.60%	92.52%	12.11				pu029	81319285	81260291(99.93%)	78831777(96.94%)	5124974(6.30%)	76194311(93.70%)			pu029	741974678	685779408	11136751322	92.43	15.01
							pu030	84135598	12620339700	150.00_150.00	39.05%	97.11%	90.98%	12.62				pu030	84739471	84678217(99.93%)	82278801(97.10%)	5551776(6.55%)	79187695(93.45%)			pu030	741974678	685807631	11563490808	92.43	15.58
