# Supplementary material for: Genome-wide association analysis and candidate gene identification for plant height in Shanxi local foxtail millet varieties
Source: Research Square preprint supplement (doi:10.21203/rs.3.rs-8422656/v1), 2026-01-14
Supplement: Supplementary file 7 [file f04c46aa759c6bfe840331a7.xlsx]

## Sheet: sheet
Table 5 Gene annotations for 61 genes in the remaining four QTL regions.
gene ID	Chr	Locus	Arabidopsis ID	Arabidopsis symbol	Arabidopsis defline	Rice ID	Rice defline	KEGG/EC	KO	GO	KOG
SETIT_032104mg	2	5281997:5284702	AT4G03220.1		Protein with RNI-like/FBD-like domains	LOC_Os07g02760.1	OsFBD13 - F-box and FBD domain containing protein, expressed
SETIT_029272mg	2	5092411:5099636	AT5G48520.1			LOC_Os07g08810.1	expressed protein		K16586	GO:0070652,GO:0051225
SETIT_033406mg	2	5100706:5103665	AT5G45480.1		Protein of unknown function (DUF594)	LOC_Os09g38930.1	expressed protein
SETIT_031567mg	2	5113739:5114287	AT1G19730.1	ATH4,ATTRX4	Thioredoxin superfamily protein	LOC_Os09g38670.2	thioredoxin, putative, expressed	1.6.5.4	K03671	GO:0045454,GO:0015035,GO:0006662	KOG0907
SETIT_033008mg	2	5115641:5116091	AT3G19950.1		RING/U-box superfamily protein	LOC_Os12g04650.4	zinc finger, C3HC4 type domain containing protein, expressed			GO:0008270,GO:0005515
SETIT_031623mg	2	5120379:5121754	AT2G14045.2			LOC_Os07g08820.1	C-Myc-binding protein, putative, expressed			GO:0006355,GO:0003713
SETIT_028825mg	2	5125484:5130818	AT5G03780.1	TRFL1	TRF-like 1	LOC_Os11g29240.1	expressed protein
SETIT_031538mg	2	5141904:5142334	AT3G51030.1	ATTRX H1,ATTRX1,TRX1	thioredoxin H-type 1	LOC_Os07g08840.1	thioredoxin, putative, expressed	1.6.5.4	K03671	GO:0045454,GO:0015035,GO:0006662	KOG0907
SETIT_031067mg	2	5154037:5158938	AT4G22140.2	EBS	PHD finger family protein / bromo-adjacent homology (BAH) domain-containing protein	LOC_Os07g08880.1	ES43 protein, putative, expressed			GO:0005515,GO:0003682
SETIT_028865mg	2	5159751:5163527	AT3G07040.1	RPM1,RPS3	NB-ARC domain-containing disease resistance protein	LOC_Os07g08890.1	disease resistance protein RPM1, putative, expressed		K13457	GO:0005515,GO:0043531	KOG4658
SETIT_029387mg	2	5164481:5169647	AT4G36400.1		FAD-linked oxidases family protein	LOC_Os07g08950.1	FAD-linked oxidoreductase protein, putative, expressed	1.1.99.39	K18204	GO:0055114,GO:0050660,GO:0016491,GO:0003824
SETIT_033071mg	2	5179681:5183861	AT1G21210.1	WAK4	wall associated kinase 4	LOC_Os10g02720.1	OsWAK99 - OsWAK receptor-like protein kinase, expressed	2.7.1.2		GO:0030247,GO:0006468,GO:0004672	KOG1187
SETIT_030621mg	2	5192799:5196663	AT5G04280.1		RNA-binding (RRM/RBD/RNP motifs) family protein with retrovirus zinc finger-like domain	LOC_Os07g08960.1	RNA recognition motif containing protein, expressed		K12885	GO:0008270,GO:0003676	KOG0109;
SETIT_030414mg	2	5198746:5201922	AT3G54970.1		D-aminoacid aminotransferase-like PLP-dependent enzymes superfamily protein	LOC_Os02g15360.1	expressed protein	4.1.3.38		GO:0008152,GO:0003824
SETIT_030060mg	2	5204756:5206317	AT5G42430.1		F-box and associated interaction domains-containing protein	LOC_Os07g35050.1	OsFBX237 - F-box domain containing protein, expressed			GO:0005515
SETIT_032346mg	2	5229911:5231967	AT1G13570.1		F-box/RNI-like superfamily protein	LOC_Os04g57920.1	OsFBX154 - F-box domain containing protein, expressed			GO:0005515
SETIT_029776mg	2	5235299:5236702	AT3G52320.1		F-box and associated interaction domains-containing protein	LOC_Os07g35050.1	OsFBX237 - F-box domain containing protein, expressed
SETIT_031919mg	2	5239561:5241327	AT1G31090.1		F-box family protein	LOC_Os07g35050.1	OsFBX237 - F-box domain containing protein, expressed			GO:0005515
SETIT_032761mg	2	5252325:5253778				LOC_Os07g35050.1	OsFBX237 - F-box domain containing protein, expressed
SETIT_032093mg	2	5256771:5257915	AT5G07610.1		F-box family protein	LOC_Os07g35050.1	OsFBX237 - F-box domain containing protein, expressed			GO:0005515
SETIT_033184mg	2	5270945:5272133	AT1G31090.1		F-box family protein	LOC_Os07g35050.1	OsFBX237 - F-box domain containing protein, expressed
SETIT_033407mg	2	5267842:5269083	AT1G31090.1		F-box family protein	LOC_Os07g35050.1	OsFBX237 - F-box domain containing protein, expressed			GO:0005515
SETIT_032785mg	2	5276995:5278158	AT5G49610.1		F-box family protein	LOC_Os07g35050.1	OsFBX237 - F-box domain containing protein, expressed			GO:0005515
SETIT_029634mg	2	24796356:24805059	AT1G04140.2		Transducin family protein / WD-4 repeat family protein	LOC_Os02g18820.2	WD domain, G-beta repeat domain containing protein, expressed		K17985	GO:0005515
SETIT_030569mg	2	24791404:24794362	AT1G76570.1		Chlorophyll A-B binding family protein	LOC_Os09g12540.1	chlorophyll A-B binding protein, putative, expressed		K14172	GO:0016020,GO:0009765
SETIT_030229mg	2	24786496:24788639	AT5G64700.1		nodulin MtN21 /EamA-like transporter family protein	LOC_Os12g33300.1	integral membrane protein DUF6 containing protein, expressed			GO:0016021,GO:0016020,GO:0022857
SETIT_030234mg	2	24691995:24696022	AT5G64700.1		nodulin MtN21 /EamA-like transporter family protein	LOC_Os12g33300.1	integral membrane protein DUF6 containing protein, expressed			GO:0016021,GO:0016020,GO:0022857
SETIT_029608mg	2	24638120:24641329	AT3G10630.1		UDP-Glycosyltransferase superfamily protein	LOC_Os09g12530.1	glycosyl transferase, group 1 domain containing protein, expressed	2.4.1.246
SETIT_007662mg	4	8254083:8255341	AT1G26945.1	KDR	basic helix-loop-helix (bHLH) DNA-binding superfamily protein	LOC_Os02g51320.1	helix-loop-helix DNA-binding domain containing protein, expressed			GO:0046983
SETIT_005784mg	4	8120301:8130342	AT1G50140.1		P-loop containing nucleoside triphosphate hydrolases superfamily protein	LOC_Os06g12160.1	AAA-type ATPase family protein, putative, expressed	3.6.1.3		GO:0009378,GO:0006310,GO:0006281
SETIT_008802mg	4	8182428:8183678	AT5G39865.1		Glutaredoxin family protein	LOC_Os02g51370.1	glutaredoxin, putative, expressed		K17479	GO:0045454,GO:0015035,GO:0009055	KOG2824
SETIT_008773mg	4	8284522:8289068	AT5G19420.1		Regulator of chromosome condensation (RCC1) family with FYVE zinc finger domain	LOC_Os01g72320.1	FYVE zinc finger domain containing protein, expressed			GO:0046872	KOG1427;KOG1427
SETIT_008628mg	4	8308877:8310321	AT5G07900.1		Mitochondrial transcription termination factor family protein	LOC_Os06g12080.1	mTERF family protein, expressed			GO:0006355,GO:0005739,GO:0003690
SETIT_007340mg	4	8325058:8328128	AT1G74520.1	ATHVA22A,HVA22A	HVA22 homologue A	LOC_Os06g12220.1	HVA22, putative, expressed
SETIT_027770mg	8	980489:984211	AT5G05350.1		PLAC8 family protein	LOC_Os11g01842.1	SAG20, putative, expressed
SETIT_027872mg	8	811515:813155	AT1G74630.1		Tetratricopeptide repeat (TPR)-like superfamily protein	LOC_Os12g02280.1	pentatricopeptide, putative, expressed
SETIT_026086mg	8	817643:821901	AT3G51630.2	ATWNK5,WNK5,ZIK1	with no lysine (K) kinase 5	LOC_Os12g02250.1	STE_PAK_Ste20_Slob_Wnk.3 - STE kinases include homologs to sterile 7, sterile 11 and sterile 20 from yeast, expressed	2.7.11.1	K08867	GO:0006468,GO:0005524,GO:0004672	KOG0198;KOG0192
SETIT_028588mg	8	822571:823136
SETIT_026653mg	8	825941:830885	AT2G29390.2	ATSMO2,SMO2-2	sterol 4-alpha-methyl-oxidase 2-2	LOC_Os11g48020.1	fatty acid hydroxylase, putative, expressed	1.14.13.72	K14424	GO:0055114,GO:0016491,GO:0006633,GO:0005506	KOG0873;KOG0873
SETIT_026369mg	8	841264:844251	AT5G58380.1	CIPK1,PKS2,SIP1,SNRK3.8	SOS3-interacting protein 1	LOC_Os12g02200.2	CAMK_KIN1/SNF1/Nim1_like.6 - CAMK includes calcium/calmodulin depedent protein kinases, expressed	2.7.11.1		GO:0007165	KOG0583
SETIT_027098mg	8	846975:848821	AT5G58375.1		Methyltransferase-related protein	LOC_Os11g02200.1	expressed protein
SETIT_026005mg	8	850110:856324	AT3G51650.1			LOC_Os11g02190.1	expressed protein
SETIT_026743mg	8	858109:860377	AT3G10940.1		dual specificity protein phosphatase (DsPTP1) family protein	LOC_Os12g02120.2	dual specificity protein phosphatase, putative, expressed			GO:0008138,GO:0006470	KOG1716;KOG1716;KOG1716;KOG1716
SETIT_026880mg	8	869013:869620
SETIT_026617mg	8	886900:888891	AT5G05340.1		Peroxidase superfamily protein	LOC_Os11g02130.1	peroxidase precursor, putative, expressed	1.11.1.7	K00430	GO:0055114,GO:0020037,GO:0006979,GO:0004601
SETIT_026644mg	8	892526:894884	AT5G05340.1		Peroxidase superfamily protein	LOC_Os11g02130.1	peroxidase precursor, putative, expressed	1.11.1.7	K00430	GO:0055114,GO:0020037,GO:0006979,GO:0004601
SETIT_026992mg	8	899872:900836	AT2G30330.1		GCN5L1 family protein	LOC_Os11g02110.1	expressed protein			GO:0031083	KOG3390
SETIT_028086mg	8	906249:908219	AT3G56250.1			LOC_Os12g02050.1	expressed protein
SETIT_027031mg	8	928304:929273	AT5G27760.1		Hypoxia-responsive family protein	LOC_Os12g02040.1	hypoxia-responsive family protein, putative, expressed
SETIT_028318mg	8	931730:933240	AT3G56230.1		BTB/POZ domain-containing protein	LOC_Os12g02030.1	BTB9 - Bric-a-Brac, Tramtrack, Broad Complex BTB domain, expressed		K10523	GO:0005515
SETIT_027416mg	8	933506:934389	AT2G40435.1			LOC_Os12g02020.1	expressed protein
SETIT_026580mg	8	935959:938741	AT1G21600.2	PTAC6	plastid transcriptionally active 6	LOC_Os11g01890.1	expressed protein
SETIT_026607mg	8	940704:944949	AT2G30280.1	DMS4,RDM4	RNA-directed DNA methylation 4	LOC_Os11g01880.1	expressed protein
SETIT_026306mg	8	946005:949606	AT2G44970.1		alpha/beta-Hydrolases superfamily protein	LOC_Os12g01930.3	lipase-related, putative, expressed
SETIT_028089mg	8	972755:973831	AT2G38420.1		Pentatricopeptide repeat (PPR) superfamily protein	LOC_Os03g40020.1	PPR repeat containing protein, expressed
SETIT_026573mg	8	970146:972571	AT1G09700.1	DRB1,HYL1	dsRNA-binding domain-like superfamily protein	LOC_Os11g01869.1	double-stranded RNA binding motif containing protein, expressed			GO:0003725
SETIT_026178mg	8	977219:979124	AT5G05350.1		PLAC8 family protein	LOC_Os11g01850.2	SAG20, putative, expressed
SETIT_026488mg	8	984729:988232	AT2G40410.2		Staphylococcal nuclease homologue	LOC_Os11g01830.1	staphylococcal nuclease homologue, putative, expressed
SETIT_026360mg	8	993309:995892	AT1G79630.1		Protein phosphatase 2C family protein	LOC_Os12g01770.1	protein phosphatase 2c, putative, expressed	3.1.3.16		GO:0006470,GO:0004722	KOG0698
SETIT_026227mg	8	996665:1000402	AT5G01720.1		RNI-like superfamily protein	LOC_Os11g01780.1	F-box/LRR-repeat protein 3, putative, expressed		K10268		KOG1947
SETIT_027610mg	8	870956:876728	AT5G05310.2		TLC ATP/ADP transporter	LOC_Os11g02159.1	expressed protein		K03301	GO:0016021,GO:0006810,GO:0005524,GO:0005471
